# Supplementary material for: Tight association of genome rearrangements with gene expression in conifer plastomes
Source: PubMed Central journal article supplement (PMC7796615; doi:10.1186/s12870-020-02809-2), 2021-01-08
Supplement: 12870_2020_2809_MOESM1_ESM.pdf [file 12870_2020_2809_MOESM1_ESM.pdf]

Table S1. Plastid C-to-U editing sites detected in this study

| Species                | Editing type | CDS          | CDS position | Codon position | Editing efficiency |
|------------------------|--------------|--------------|--------------|----------------|--------------------|
| <i>Agathis dammara</i> | Silent       | <i>atpB</i>  | 1,413        | 3              | 39.10%             |
| <i>Agathis dammara</i> | Non-silent   | <i>atpF</i>  | 23           | 2              | 83.80%             |
| <i>Agathis dammara</i> | Non-silent   | <i>atpI</i>  | 617          | 2              | 95.80%             |
| <i>Agathis dammara</i> | Non-silent   | <i>atpI</i>  | 431          | 2              | 98.50%             |
| <i>Agathis dammara</i> | Non-silent   | <i>ccsA</i>  | 404          | 2              | 93.10%             |
| <i>Agathis dammara</i> | Antisense    | <i>matK</i>  | 1,534        | -              | 21.20%             |
| <i>Agathis dammara</i> | Non-silent   | <i>matK</i>  | 895          | 1              | 75.80%             |
| <i>Agathis dammara</i> | Non-silent   | <i>ndhA</i>  | 47           | 2              | 78.30%             |
| <i>Agathis dammara</i> | Non-silent   | <i>ndhA</i>  | 482          | 2              | 85.00%             |
| <i>Agathis dammara</i> | Non-silent   | <i>ndhB</i>  | 776          | 2              | 92.30%             |
| <i>Agathis dammara</i> | Non-silent   | <i>ndhB</i>  | 1,385        | 2              | 94.20%             |
| <i>Agathis dammara</i> | Non-silent   | <i>ndhD</i>  | 272          | 2              | 68.80%             |
| <i>Agathis dammara</i> | Non-silent   | <i>ndhE</i>  | 142          | 1              | 93.30%             |
| <i>Agathis dammara</i> | Silent       | <i>ndhE</i>  | 180          | 3              | 97.00%             |
| <i>Agathis dammara</i> | Non-silent   | <i>ndhE</i>  | 197          | 2              | 89.40%             |
| <i>Agathis dammara</i> | Non-silent   | <i>ndhF</i>  | 1,802        | 2              | 85.50%             |
| <i>Agathis dammara</i> | Non-silent   | <i>ndhF</i>  | 1,841        | 2              | 88.00%             |
| <i>Agathis dammara</i> | Non-silent   | <i>ndhF</i>  | 2,039        | 2              | 93.30%             |
| <i>Agathis dammara</i> | Antisense    | <i>ndhF</i>  | 2,026        | -              | 21.90%             |
| <i>Agathis dammara</i> | Non-silent   | <i>ndhH</i>  | 1,094        | 2              | 74.60%             |
| <i>Agathis dammara</i> | Non-silent   | <i>psbH</i>  | 173          | 2              | 98.30%             |
| <i>Agathis dammara</i> | Non-silent   | <i>psbM</i>  | 47           | 2              | 94.70%             |
| <i>Agathis dammara</i> | Non-silent   | <i>psbN</i>  | 37           | 1              | 87.20%             |
| <i>Agathis dammara</i> | Non-silent   | <i>rpl20</i> | 269          | 2              | 79.10%             |
| <i>Agathis dammara</i> | Non-silent   | <i>rpoB</i>  | 2,912        | 2              | 63.70%             |
| <i>Agathis dammara</i> | Non-silent   | <i>rpoB</i>  | 2,495        | 2              | 45.00%             |
| <i>Agathis dammara</i> | Non-silent   | <i>rpoB</i>  | 473          | 2              | 35.80%             |
| <i>Agathis dammara</i> | Non-silent   | <i>rpoC1</i> | 1,061        | 2              | 82.40%             |
| <i>Agathis dammara</i> | Non-silent   | <i>rpoC1</i> | 470          | 2              | 74.30%             |
| <i>Agathis dammara</i> | Non-silent   | <i>rpoC1</i> | 419          | 2              | 63.00%             |
| <i>Agathis dammara</i> | Silent       | <i>rpoC1</i> | 168          | 3              | 46.30%             |
| <i>Agathis dammara</i> | Non-silent   | <i>rpoC1</i> | 164          | 2              | 84.60%             |
| <i>Agathis dammara</i> | Non-silent   | <i>rpoC2</i> | 2,909        | 2              | 78.60%             |
| <i>Agathis dammara</i> | Non-silent   | <i>rpoC2</i> | 155          | 2              | 69.90%             |
| <i>Agathis dammara</i> | Non-silent   | <i>rps14</i> | 149          | 2              | 91.60%             |
| <i>Agathis dammara</i> | Silent       | <i>rps8</i>  | 240          | 3              | 37.80%             |

|                                |            |              |       |   |        |
|--------------------------------|------------|--------------|-------|---|--------|
| <i>Agathis dammara</i>         | Non-silent | <i>rps8</i>  | 203   | 2 | 70.60% |
| <i>Agathis dammara</i>         | Non-silent | <i>rps8</i>  | 161   | 2 | 79.70% |
| <i>Agathis dammara</i>         | Non-silent | <i>rps8</i>  | 155   | 2 | 76.70% |
| <i>Agathis dammara</i>         | Non-silent | <i>rps8</i>  | 145   | 1 | 69.70% |
| <i>Agathis dammara</i>         | Non-silent | <i>ycf1</i>  | 6,290 | 2 | 53.00% |
| <i>Agathis dammara</i>         | Non-silent | <i>ycf2</i>  | 4,838 | 2 | 88.00% |
| <i>Cephalotaxus wilsoniana</i> | Non-silent | <i>atpA</i>  | 773   | 2 | 95.90% |
| <i>Cephalotaxus wilsoniana</i> | Non-silent | <i>atpI</i>  | 614   | 2 | 93.30% |
| <i>Cephalotaxus wilsoniana</i> | Antisense  | <i>chlB</i>  | 18    | - | 12.20% |
| <i>Cephalotaxus wilsoniana</i> | Non-silent | <i>chlN</i>  | 850   | 1 | 94.40% |
| <i>Cephalotaxus wilsoniana</i> | Non-silent | <i>matK</i>  | 892   | 1 | 69.30% |
| <i>Cephalotaxus wilsoniana</i> | Non-silent | <i>matK</i>  | 1,358 | 2 | 53.40% |
| <i>Cephalotaxus wilsoniana</i> | Non-silent | <i>ndhB</i>  | 28    | 1 | 60.10% |
| <i>Cephalotaxus wilsoniana</i> | Non-silent | <i>ndhB</i>  | 776   | 2 | 83.30% |
| <i>Cephalotaxus wilsoniana</i> | Non-silent | <i>ndhD</i>  | 1,193 | 2 | 94.80% |
| <i>Cephalotaxus wilsoniana</i> | Non-silent | <i>ndhE</i>  | 293   | 2 | 95.40% |
| <i>Cephalotaxus wilsoniana</i> | Non-silent | <i>ndhF</i>  | 704   | 2 | 84.60% |
| <i>Cephalotaxus wilsoniana</i> | Non-silent | <i>ndhF</i>  | 1,808 | 2 | 86.80% |
| <i>Cephalotaxus wilsoniana</i> | Non-silent | <i>ndhF</i>  | 1,847 | 2 | 86.80% |
| <i>Cephalotaxus wilsoniana</i> | Non-silent | <i>petG</i>  | 44    | 2 | 50.50% |
| <i>Cephalotaxus wilsoniana</i> | Non-silent | <i>petL</i>  | 74    | 2 | 80.40% |
| <i>Cephalotaxus wilsoniana</i> | Non-silent | <i>psaA</i>  | 725   | 2 | 97.80% |
| <i>Cephalotaxus wilsoniana</i> | Non-silent | <i>psaC</i>  | 146   | 2 | 98.20% |
| <i>Cephalotaxus wilsoniana</i> | Non-silent | <i>psbH</i>  | 173   | 2 | 98.30% |
| <i>Cephalotaxus wilsoniana</i> | Non-silent | <i>psbM</i>  | 47    | 2 | 72.20% |
| <i>Cephalotaxus wilsoniana</i> | Non-silent | <i>psbN</i>  | 37    | 1 | 79.20% |
| <i>Cephalotaxus wilsoniana</i> | Non-silent | <i>rpoB</i>  | 920   | 2 | 67.10% |
| <i>Cephalotaxus wilsoniana</i> | Non-silent | <i>rpoB</i>  | 884   | 2 | 67.80% |
| <i>Cephalotaxus wilsoniana</i> | Non-silent | <i>rpoB</i>  | 839   | 2 | 52.10% |
| <i>Cephalotaxus wilsoniana</i> | Non-silent | <i>rpoB</i>  | 473   | 2 | 35.00% |
| <i>Cephalotaxus wilsoniana</i> | Non-silent | <i>rpoC1</i> | 479   | 2 | 83.30% |
| <i>Cephalotaxus wilsoniana</i> | Non-silent | <i>rpoC2</i> | 2,867 | 2 | 80.40% |
| <i>Cephalotaxus wilsoniana</i> | Non-silent | <i>rpoC2</i> | 2,615 | 2 | 78.60% |
| <i>Cephalotaxus wilsoniana</i> | Non-silent | <i>rpoC2</i> | 176   | 2 | 40.80% |
| <i>Cephalotaxus wilsoniana</i> | Non-silent | <i>rps8</i>  | 172   | 1 | 51.30% |
| <i>Cephalotaxus wilsoniana</i> | Non-silent | <i>rps8</i>  | 188   | 2 | 59.10% |
| <i>Cephalotaxus wilsoniana</i> | Non-silent | <i>rps8</i>  | 230   | 2 | 92.00% |
| <i>Cephalotaxus wilsoniana</i> | Non-silent | <i>ycf3</i>  | 191   | 2 | 76.80% |

|                              |            |              |       |   |        |
|------------------------------|------------|--------------|-------|---|--------|
| <i>Cunninghamia konishii</i> | Non-silent | <i>atpA</i>  | 773   | 2 | 94.90% |
| <i>Cunninghamia konishii</i> | Antisense  | <i>atpA</i>  | 184   | - | 11.80% |
| <i>Cunninghamia konishii</i> | Antisense  | <i>chlB</i>  | 18    | - | 11.80% |
| <i>Cunninghamia konishii</i> | Non-silent | <i>ndhB</i>  | 776   | 2 | 90.90% |
| <i>Cunninghamia konishii</i> | Non-silent | <i>ndhB</i>  | 1,127 | 2 | 81.50% |
| <i>Cunninghamia konishii</i> | Non-silent | <i>ndhE</i>  | 293   | 2 | 97.40% |
| <i>Cunninghamia konishii</i> | Non-silent | <i>ndhF</i>  | 25    | 1 | 95.00% |
| <i>Cunninghamia konishii</i> | Non-silent | <i>ndhH</i>  | 1,094 | 2 | 59.10% |
| <i>Cunninghamia konishii</i> | Silent     | <i>petN</i>  | 12    | 3 | 22.20% |
| <i>Cunninghamia konishii</i> | Non-silent | <i>psbZ</i>  | 149   | 2 | 46.20% |
| <i>Cunninghamia konishii</i> | Silent     | <i>rpoB</i>  | 390   | 3 | 12.00% |
| <i>Cunninghamia konishii</i> | Non-silent | <i>rpoB</i>  | 917   | 2 | 51.70% |
| <i>Cunninghamia konishii</i> | Non-silent | <i>rpoB</i>  | 962   | 2 | 76.00% |
| <i>Cunninghamia konishii</i> | Non-silent | <i>rpoB</i>  | 1,486 | 1 | 51.20% |
| <i>Cunninghamia konishii</i> | Non-silent | <i>rpoC1</i> | 584   | 2 | 41.00% |
| <i>Cunninghamia konishii</i> | Non-silent | <i>rpoC2</i> | 2,351 | 2 | 75.10% |
| <i>Cunninghamia konishii</i> | Non-silent | <i>rps14</i> | 149   | 2 | 76.70% |
| <i>Cunninghamia konishii</i> | Non-silent | <i>rps8</i>  | 188   | 2 | 49.40% |
| <i>Cunninghamia konishii</i> | Non-silent | <i>rps8</i>  | 230   | 2 | 87.00% |
| <i>Cunninghamia konishii</i> | Silent     | <i>ycf1</i>  | 6,850 | 1 | 35.90% |
| <i>Cunninghamia konishii</i> | Non-silent | <i>ycf3</i>  | 191   | 2 | 61.50% |
| <i>Keteleeria davidiana</i>  | Non-silent | <i>accD</i>  | 935   | 2 | 81.60% |
| <i>Keteleeria davidiana</i>  | Non-silent | <i>atpA</i>  | 554   | 2 | 94.70% |
| <i>Keteleeria davidiana</i>  | Non-silent | <i>atpA</i>  | 773   | 2 | 88.60% |
| <i>Keteleeria davidiana</i>  | Non-silent | <i>atpA</i>  | 1,004 | 2 | 95.60% |
| <i>Keteleeria davidiana</i>  | Non-silent | <i>atpB</i>  | 1,049 | 2 | 76.00% |
| <i>Keteleeria davidiana</i>  | Non-silent | <i>atpB</i>  | 1,217 | 2 | 97.90% |
| <i>Keteleeria davidiana</i>  | Non-silent | <i>atpF</i>  | 65    | 2 | 71.40% |
| <i>Keteleeria davidiana</i>  | Non-silent | <i>atpF</i>  | 101   | 2 | 59.40% |
| <i>Keteleeria davidiana</i>  | Non-silent | <i>atpF</i>  | 370   | 1 | 56.30% |
| <i>Keteleeria davidiana</i>  | Non-silent | <i>atpI</i>  | 152   | 2 | 92.70% |
| <i>Keteleeria davidiana</i>  | Non-silent | <i>atpI</i>  | 428   | 2 | 77.20% |
| <i>Keteleeria davidiana</i>  | Non-silent | <i>atpI</i>  | 614   | 2 | 90.70% |
| <i>Keteleeria davidiana</i>  | Non-silent | <i>ccsA</i>  | 716   | 2 | 74.70% |
| <i>Keteleeria davidiana</i>  | Non-silent | <i>ccsA</i>  | 704   | 2 | 81.30% |
| <i>Keteleeria davidiana</i>  | Non-silent | <i>ccsA</i>  | 407   | 2 | 79.60% |
| <i>Keteleeria davidiana</i>  | Non-silent | <i>cemA</i>  | 701   | 2 | 80.70% |
| <i>Keteleeria davidiana</i>  | Non-silent | <i>cemA</i>  | 116   | 2 | 14.70% |

|                             |            |              |       |   |        |
|-----------------------------|------------|--------------|-------|---|--------|
| <i>Keteleeria davidiana</i> | Non-silent | <i>chlB</i>  | 1,280 | 2 | 22.60% |
| <i>Keteleeria davidiana</i> | Non-silent | <i>chlB</i>  | 646   | 1 | 46.00% |
| <i>Keteleeria davidiana</i> | Non-silent | <i>chlB</i>  | 13    | 1 | 29.80% |
| <i>Keteleeria davidiana</i> | Non-silent | <i>chlN</i>  | 856   | 1 | 15.10% |
| <i>Keteleeria davidiana</i> | Silent     | <i>chlN</i>  | 1,005 | 3 | 28.10% |
| <i>Keteleeria davidiana</i> | Non-silent | <i>clpP</i>  | 194   | 2 | 87.70% |
| <i>Keteleeria davidiana</i> | Non-silent | <i>matK</i>  | 1,466 | 2 | 19.10% |
| <i>Keteleeria davidiana</i> | Non-silent | <i>matK</i>  | 892   | 1 | 34.30% |
| <i>Keteleeria davidiana</i> | Non-silent | <i>matK</i>  | 527   | 2 | 72.10% |
| <i>Keteleeria davidiana</i> | Non-silent | <i>petB</i>  | 155   | 2 | 93.40% |
| <i>Keteleeria davidiana</i> | Non-silent | <i>petB</i>  | 599   | 2 | 59.90% |
| <i>Keteleeria davidiana</i> | Non-silent | <i>petB</i>  | 634   | 1 | 64.90% |
| <i>Keteleeria davidiana</i> | Non-silent | <i>petG</i>  | 80    | 2 | 74.60% |
| <i>Keteleeria davidiana</i> | Non-silent | <i>petG</i>  | 17    | 2 | 89.80% |
| <i>Keteleeria davidiana</i> | Non-silent | <i>petL</i>  | 74    | 2 | 92.40% |
| <i>Keteleeria davidiana</i> | Non-silent | <i>psaI</i>  | 79    | 1 | 83.90% |
| <i>Keteleeria davidiana</i> | Non-silent | <i>psbB</i>  | 1,391 | 2 | 98.60% |
| <i>Keteleeria davidiana</i> | Non-silent | <i>psbC</i>  | 1,211 | 2 | 99.10% |
| <i>Keteleeria davidiana</i> | Non-silent | <i>psbC</i>  | 524   | 2 | 88.40% |
| <i>Keteleeria davidiana</i> | Non-silent | <i>psbD</i>  | 935   | 2 | 98.40% |
| <i>Keteleeria davidiana</i> | Non-silent | <i>psbD</i>  | 839   | 2 | 98.80% |
| <i>Keteleeria davidiana</i> | Non-silent | <i>psbD</i>  | 398   | 2 | 98.80% |
| <i>Keteleeria davidiana</i> | Non-silent | <i>psbE</i>  | 214   | 1 | 85.80% |
| <i>Keteleeria davidiana</i> | Silent     | <i>psbK</i>  | 93    | 3 | 34.80% |
| <i>Keteleeria davidiana</i> | Non-silent | <i>psbK</i>  | 92    | 2 | 95.50% |
| <i>Keteleeria davidiana</i> | Non-silent | <i>psbZ</i>  | 149   | 2 | 95.40% |
| <i>Keteleeria davidiana</i> | Non-silent | <i>psbZ</i>  | 20    | 2 | 47.90% |
| <i>Keteleeria davidiana</i> | Non-silent | <i>rpl2</i>  | 515   | 2 | 42.40% |
| <i>Keteleeria davidiana</i> | Non-silent | <i>rpl2</i>  | 203   | 2 | 75.80% |
| <i>Keteleeria davidiana</i> | Non-silent | <i>rpl23</i> | 61    | 1 | 42.40% |
| <i>Keteleeria davidiana</i> | Non-silent | <i>rpl32</i> | 58    | 1 | 93.70% |
| <i>Keteleeria davidiana</i> | Silent     | <i>rpoA</i>  | 100   | 1 | 44.40% |
| <i>Keteleeria davidiana</i> | Non-silent | <i>rpoB</i>  | 397   | 1 | 21.80% |
| <i>Keteleeria davidiana</i> | Non-silent | <i>rpoB</i>  | 545   | 2 | 50.90% |
| <i>Keteleeria davidiana</i> | Non-silent | <i>rpoB</i>  | 815   | 2 | 28.50% |
| <i>Keteleeria davidiana</i> | Non-silent | <i>rpoB</i>  | 1,841 | 2 | 62.90% |
| <i>Keteleeria davidiana</i> | Non-silent | <i>rpoB</i>  | 2,444 | 2 | 46.80% |
| <i>Keteleeria davidiana</i> | Non-silent | <i>rpoB</i>  | 2,722 | 1 | 23.10% |

|                             |            |              |       |   |        |
|-----------------------------|------------|--------------|-------|---|--------|
| <i>Keteleeria davidiana</i> | Non-silent | <i>rpoB</i>  | 2,861 | 2 | 51.60% |
| <i>Keteleeria davidiana</i> | Non-silent | <i>rpoC1</i> | 164   | 2 | 32.60% |
| <i>Keteleeria davidiana</i> | Non-silent | <i>rpoC1</i> | 479   | 2 | 66.90% |
| <i>Keteleeria davidiana</i> | Non-silent | <i>rpoC1</i> | 875   | 2 | 22.60% |
| <i>Keteleeria davidiana</i> | Non-silent | <i>rpoC1</i> | 1,487 | 2 | 41.20% |
| <i>Keteleeria davidiana</i> | Non-silent | <i>rpoC2</i> | 937   | 1 | 21.10% |
| <i>Keteleeria davidiana</i> | Non-silent | <i>rpoC2</i> | 2,729 | 2 | 45.80% |
| <i>Keteleeria davidiana</i> | Non-silent | <i>rpoC2</i> | 2,981 | 2 | 63.60% |
| <i>Keteleeria davidiana</i> | Non-silent | <i>rpoC2</i> | 3,254 | 2 | 64.60% |
| <i>Keteleeria davidiana</i> | Antisense  | <i>rpoC2</i> | 1,968 | - | 41.80% |
| <i>Keteleeria davidiana</i> | Non-silent | <i>rps14</i> | 146   | 2 | 49.70% |
| <i>Keteleeria davidiana</i> | Silent     | <i>rps2</i>  | 222   | 3 | 27.80% |
| <i>Keteleeria davidiana</i> | Non-silent | <i>rps2</i>  | 344   | 2 | 54.70% |
| <i>Keteleeria davidiana</i> | Non-silent | <i>rps2</i>  | 662   | 2 | 57.40% |
| <i>Keteleeria davidiana</i> | Non-silent | <i>rps4</i>  | 272   | 2 | 50.80% |
| <i>Keteleeria davidiana</i> | Non-silent | <i>rps8</i>  | 254   | 2 | 45.00% |
| <i>Keteleeria davidiana</i> | Non-silent | <i>rps8</i>  | 188   | 2 | 40.40% |
| <i>Keteleeria davidiana</i> | Non-silent | <i>rps8</i>  | 182   | 2 | 37.00% |
| <i>Keteleeria davidiana</i> | Silent     | <i>ycf1</i>  | 4,131 | 3 | 29.60% |
| <i>Keteleeria davidiana</i> | Antisense  | <i>ycf2</i>  | 3,107 | - | 44.90% |
| <i>Keteleeria davidiana</i> | Non-silent | <i>ycf2</i>  | 5,003 | 2 | 25.90% |
| <i>Keteleeria davidiana</i> | Non-silent | <i>ycf2</i>  | 4,723 | 1 | 58.20% |
| <i>Keteleeria davidiana</i> | Non-silent | <i>ycf2</i>  | 569   | 2 | 14.70% |
| <i>Nageia nagi</i>          | Non-silent | <i>atpA</i>  | 773   | 2 | 99.80% |
| <i>Nageia nagi</i>          | Antisense  | <i>atpI</i>  | 403   | - | 15.10% |
| <i>Nageia nagi</i>          | Antisense  | <i>atpI</i>  | 31    | - | 24.60% |
| <i>Nageia nagi</i>          | Non-silent | <i>atpI</i>  | 617   | 2 | 99.50% |
| <i>Nageia nagi</i>          | Non-silent | <i>ndhD</i>  | 1,193 | 2 | 98.10% |
| <i>Nageia nagi</i>          | Non-silent | <i>ndhF</i>  | 25    | 1 | 57.50% |
| <i>Nageia nagi</i>          | Non-silent | <i>ndhH</i>  | 1,088 | 2 | 91.70% |
| <i>Nageia nagi</i>          | Antisense  | <i>ndhI</i>  | 48    | - | 13.90% |
| <i>Nageia nagi</i>          | Non-silent | <i>rpoA</i>  | 299   | 2 | 90.30% |
| <i>Nageia nagi</i>          | Non-silent | <i>rpoB</i>  | 2,894 | 2 | 46.80% |
| <i>Nageia nagi</i>          | Non-silent | <i>rpoB</i>  | 470   | 2 | 38.00% |
| <i>Nageia nagi</i>          | Non-silent | <i>rpoC1</i> | 1,085 | 2 | 34.10% |
| <i>Nageia nagi</i>          | Non-silent | <i>rpoC2</i> | 2,822 | 2 | 88.30% |
| <i>Nageia nagi</i>          | Non-silent | <i>rps14</i> | 149   | 2 | 99.20% |
| <i>Nageia nagi</i>          | Non-silent | <i>rps8</i>  | 172   | 1 | 74.10% |

|                                 |            |              |       |   |        |
|---------------------------------|------------|--------------|-------|---|--------|
| <i>Nageia nagi</i>              | Non-silent | <i>rps8</i>  | 182   | 2 | 84.40% |
| <i>Nageia nagi</i>              | Non-silent | <i>rps8</i>  | 188   | 2 | 83.40% |
| <i>Nageia nagi</i>              | Silent     | <i>rps8</i>  | 267   | 3 | 41.40% |
| <i>Nageia nagi</i>              | Non-silent | <i>rps8</i>  | 274   | 1 | 33.00% |
| <i>Nageia nagi</i>              | Non-silent | <i>rps8</i>  | 284   | 2 | 25.80% |
| <i>Nageia nagi</i>              | Non-silent | <i>ycf1</i>  | 455   | 2 | 29.70% |
| <i>Nageia nagi</i>              | Non-silent | <i>ycf2</i>  | 4,733 | 2 | 97.10% |
| <i>Nageia nagi</i>              | Non-silent | <i>ycf3</i>  | 191   | 2 | 62.00% |
| <i>Sciadopitys verticillata</i> | Non-silent | <i>ccsA</i>  | 407   | 2 | 81.90% |
| <i>Sciadopitys verticillata</i> | Non-silent | <i>chlB</i>  | 13    | 1 | 48.60% |
| <i>Sciadopitys verticillata</i> | Non-silent | <i>chlN</i>  | 850   | 1 | 83.50% |
| <i>Sciadopitys verticillata</i> | Non-silent | <i>matK</i>  | 892   | 1 | 79.80% |
| <i>Sciadopitys verticillata</i> | Non-silent | <i>ndhA</i>  | 23    | 2 | 80.60% |
| <i>Sciadopitys verticillata</i> | Non-silent | <i>ndhA</i>  | 338   | 2 | 25.90% |
| <i>Sciadopitys verticillata</i> | Non-silent | <i>ndhA</i>  | 482   | 2 | 81.80% |
| <i>Sciadopitys verticillata</i> | Non-silent | <i>ndhD</i>  | 272   | 2 | 87.80% |
| <i>Sciadopitys verticillata</i> | Non-silent | <i>ndhD</i>  | 1,193 | 2 | 93.60% |
| <i>Sciadopitys verticillata</i> | Non-silent | <i>ndhE</i>  | 293   | 2 | 90.20% |
| <i>Sciadopitys verticillata</i> | Antisense  | <i>ndhF</i>  | 2,026 | - | 15.60% |
| <i>Sciadopitys verticillata</i> | Non-silent | <i>ndhF</i>  | 2,039 | 2 | 90.90% |
| <i>Sciadopitys verticillata</i> | Non-silent | <i>ndhF</i>  | 1,802 | 2 | 86.20% |
| <i>Sciadopitys verticillata</i> | Non-silent | <i>ndhF</i>  | 25    | 1 | 64.30% |
| <i>Sciadopitys verticillata</i> | Silent     | <i>ndhH</i>  | 1,158 | 3 | 46.80% |
| <i>Sciadopitys verticillata</i> | Non-silent | <i>petD</i>  | 134   | 2 | 98.80% |
| <i>Sciadopitys verticillata</i> | Non-silent | <i>psaA</i>  | 725   | 2 | 97.70% |
| <i>Sciadopitys verticillata</i> | Non-silent | <i>psaC</i>  | 146   | 2 | 98.70% |
| <i>Sciadopitys verticillata</i> | Silent     | <i>psbA</i>  | 696   | 3 | 87.70% |
| <i>Sciadopitys verticillata</i> | Non-silent | <i>psbC</i>  | 523   | 1 | 75.60% |
| <i>Sciadopitys verticillata</i> | Non-silent | <i>psbC</i>  | 524   | 2 | 94.90% |
| <i>Sciadopitys verticillata</i> | Non-silent | <i>psbE</i>  | 214   | 1 | 96.40% |
| <i>Sciadopitys verticillata</i> | Non-silent | <i>psbK</i>  | 92    | 2 | 98.70% |
| <i>Sciadopitys verticillata</i> | Silent     | <i>rbcl</i>  | 93    | 3 | 10.10% |
| <i>Sciadopitys verticillata</i> | Antisense  | <i>rpl33</i> | 135   | - | 12.40% |
| <i>Sciadopitys verticillata</i> | Non-silent | <i>rpoB</i>  | 887   | 2 | 74.00% |
| <i>Sciadopitys verticillata</i> | Non-silent | <i>rpoB</i>  | 923   | 2 | 69.20% |
| <i>Sciadopitys verticillata</i> | Non-silent | <i>rpoB</i>  | 3,044 | 2 | 68.90% |
| <i>Sciadopitys verticillata</i> | Silent     | <i>rpoC2</i> | 2,944 | 1 | 17.20% |
| <i>Sciadopitys verticillata</i> | Non-silent | <i>rpoC2</i> | 2,624 | 2 | 86.60% |

|                                 |            |              |     |   |        |
|---------------------------------|------------|--------------|-----|---|--------|
| <i>Sciadopitys verticillata</i> | Non-silent | <i>rpoC2</i> | 152 | 2 | 84.10% |
| <i>Sciadopitys verticillata</i> | Non-silent | <i>rps14</i> | 149 | 2 | 94.40% |
| <i>Sciadopitys verticillata</i> | Non-silent | <i>rps8</i>  | 155 | 2 | 50.80% |
| <i>Sciadopitys verticillata</i> | Non-silent | <i>rps8</i>  | 161 | 2 | 57.50% |
| <i>Sciadopitys verticillata</i> | Silent     | <i>rps8</i>  | 237 | 3 | 28.80% |

---
