# Supplementary material for: Tight association of genome rearrangements with gene expression in conifer plastomes
Source: PubMed Central journal article supplement (PMC7796615; doi:10.1186/s12870-020-02809-2), 2021-01-08
Supplement: 12870_2020_2809_MOESM2_ESM.pdf [file 12870_2020_2809_MOESM2_ESM.pdf]

Table S2. Conifer species, sampling locality, voucher numbers, DNaseq, and RNAseq data used in this study

| Family          | Species                         | Sampling locality                             | Voucher number | GenBank accession | DNaseq* | RNAseq* |
|-----------------|---------------------------------|-----------------------------------------------|----------------|-------------------|---------|---------|
| Pinaceae        | <i>Keteleeria davidiana</i>     | Taipei Botanical Garden, Taiwan               | Chaw 1470      | LC571883          | 16.8 Gb | 12.6 Gb |
| Araucariaceae   | <i>Agathis dammara</i>          | Taipei Botanical Garden, Taiwan               | Chaw 1490      | LC571739          | 8.1 Gb  | 12.8 Gb |
| Podocarpaceae   | <i>Nageia nagi</i>              | Academia Sinica, Taiwan                       | Chaw 1491      | LC572146          | 11.1 Gb | 12.7 Gb |
| Sciadopityaceae | <i>Sciadopitys verticillata</i> | Taipei Floriculture Experiment Center, Taiwan | Chaw 1497      | LC572147          | 14.6 Gb | 12.8 Gb |
| Taxaceae        | <i>Cephalotaxus wilsoniana</i>  | Taipei Botanical Garden, Taiwan               | Chaw 1492      | LC571740          | 15.6 Gb | 12.8 Gb |
| Cupressaceae    | <i>Cunninghamia konishii</i>    | Academia Sinica, Taiwan                       | Chaw 1438      | LC571741          | 16.5 Gb | 12.7 Gb |

\*150-bp paired-end reads after quality trimming
