# Supplementary material for: Tight association of genome rearrangements with gene expression in conifer plastomes
Source: PubMed Central journal article supplement (PMC7796615; doi:10.1186/s12870-020-02809-2), 2021-01-08
Supplement: 12870_2020_2809_MOESM3_ESM.pdf [file 12870_2020_2809_MOESM3_ESM.pdf]

Table S3. Plastid CDSs used in phylogenetic tree construction

---

*accD, atpA, atpB, atpE, atpF, atpH, atpI, ccsA, cemaA, chlB, chlL, chlN, clpP, infA, matK, ndhA, ndhB, ndhC, ndhD, ndhE, ndhF, ndhG, ndhH, ndhI, ndhJ, ndhK, petA, petB, petD, petG, petL, petN, psaA, psaB, psaC, psal, psaj, psam, psbA, psbB, psbC, psbD, psbE, psbF, psbH, psbl, psbj, psbk, psbl, psbm, psbn, psbt, psbz, rbcL, rpl2, rpl14, rpl16, rpl20, rpl22, rpl23, rpl32, rpl33, rpl36, rpoA, rpoB, rpoC1, rpoC2, rps2, rps3, rps4, rps7, rps8, rps11, rps12, rps14, rps15, rps16, rps18, rps19, ycf1, ycf2, ycf3, ycf4*

---
