# Supplementary material for: Tight association of genome rearrangements with gene expression in conifer plastomes
Source: PubMed Central journal article supplement (PMC7796615; doi:10.1186/s12870-020-02809-2), 2021-01-08

Figure S7

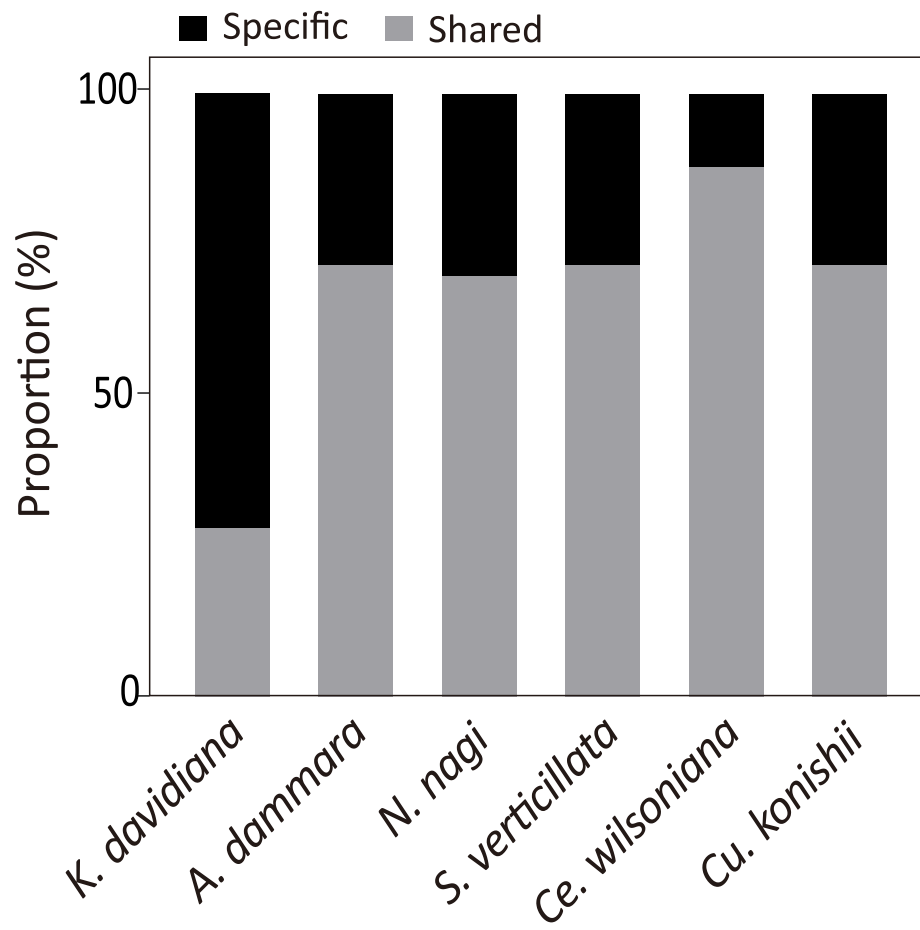

Supplement: 12870_2020_2809_MOESM10_ESM.pdf [file 12870_2020_2809_MOESM10_ESM.pdf]
